# Supplementary material for: Over-optimization of academic publishing metrics: observing Goodhart’s Law in action
Source: PubMed Central journal article supplement (PMC6541803; doi:10.1093/gigascience/giz053), 2019-05-30
Supplement: giz053_response_to_reviewer_comments_revision_1.pdf [file giz053_response_to_reviewer_comments_revision_1.pdf]

# Author's Response To Reviewer Comments

Close

Please find the response letter attached

Close
